# Supplementary material for: Enhancement of visual cortex plasticity by dark exposure
Source: PubMed Central journal article supplement (PMC5247591; doi:10.1098/rstb.2016.0159), 2017-03-05
Supplement: rstb20160159supp1.pdf [file rstb20160159supp1.pdf]

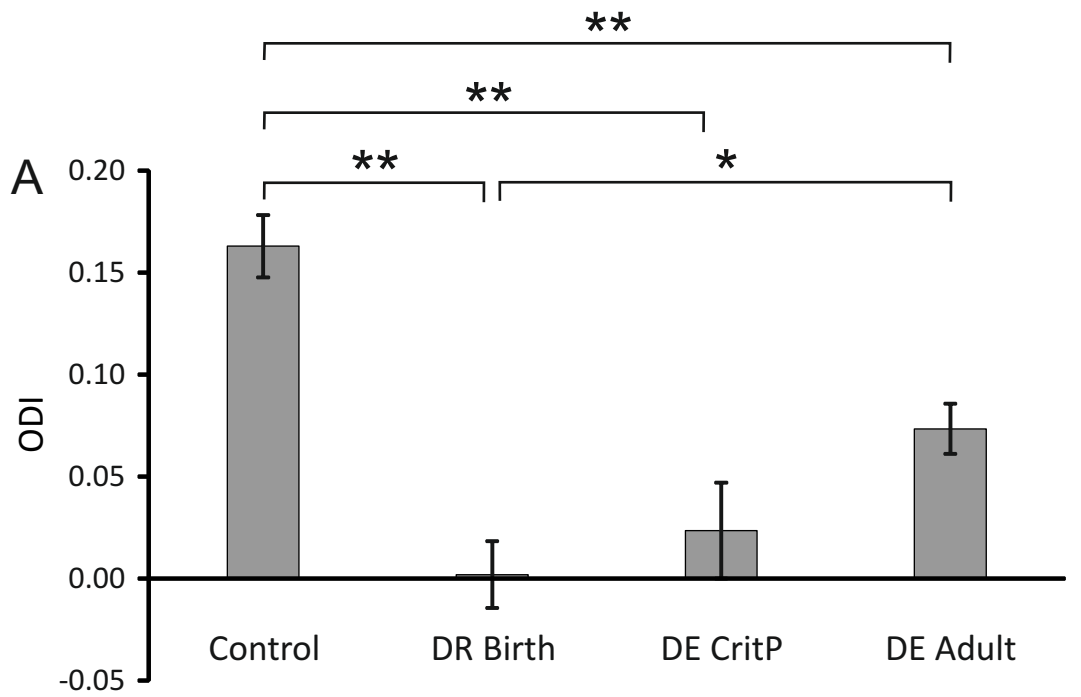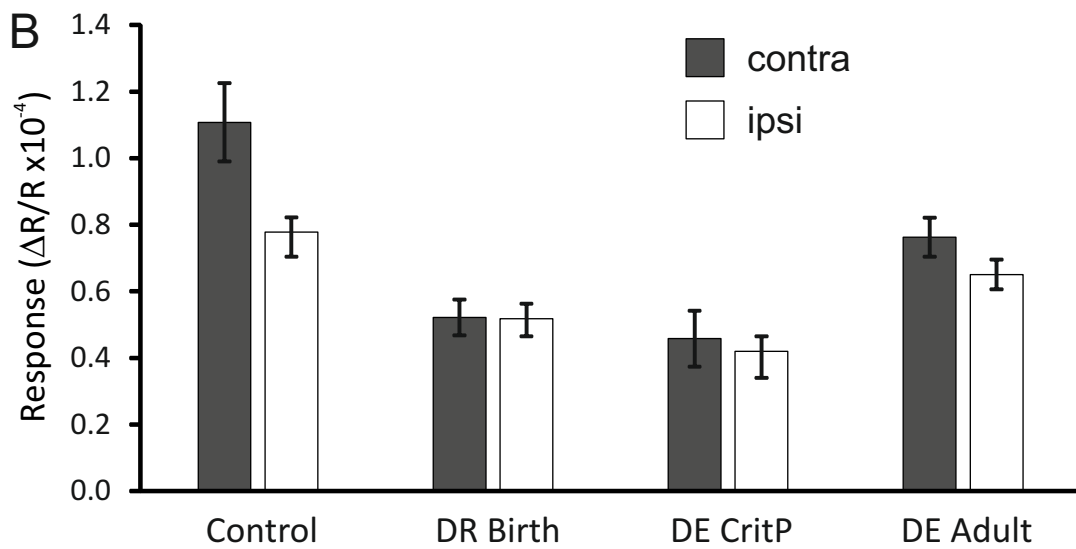

Supplementary Figure 1
